# Supplementary material for: Hierarchical assembly of tryptophan zipper peptides into stress-relaxing bioactive hydrogels
Source: PubMed Central journal article supplement (PMC10593748; doi:10.1038/s41467-023-41907-1), 2023-10-23
Supplement: 41467_2023_41907_MOESM8_ESM.pdf [file 41467_2023_41907_MOESM8_ESM.pdf]

**Title:** Supplementary Movie 1.

**Description:** Video recording of Trpzip gel prepared at 1% (w/v) in DMEM, pH 7 after gelation overnight at 37 °C.

**Title:** Supplementary Movie 2.

**Description:** Brightfield live imaging over 90 minutes of organoid response to treatment with the CFTR modulator Trikafta in Matrigel.

**Title:** Supplementary Movie 3.

**Description:** Brightfield live imaging over 90 minutes of organoid response to treatment with the CFTR modulator Trikafta in pure Trpzip hydrogels.

**Title:** Supplementary Movie 4.

**Description:** Brightfield live imaging over 90 minutes of organoid response to treatment with the CFTR modulator Trikafta in Trpzip gels with low laminin content.

**Title:** Supplementary Movie 5.

**Description:** Brightfield live imaging over 90 minutes of organoid response to treatment with the CFTR modulator Trikafta in Trpzip gels with high laminin content
